# Supplementary material for: Application of Magnetic Nano-Immobilized Enzyme in Soybean Oil Degumming: Numerical Simulation in a Liquid-Solid MFB
Source: Hindawi journal article supplement (doi:10.1155/2021/6652780), 2021-09-16
Supplement: f1 [file 6652780.f1.docx]

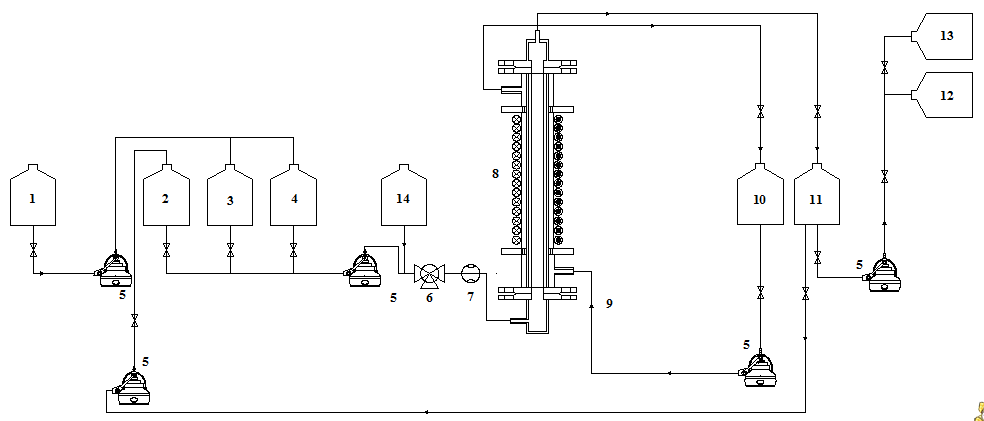


**Suppl. Fig. 1** Process diagram of liquid solid two phase magnetic fluidized bed degumming process:1-crude oil reservoir 2-liquid circulator 3-liquid buffer 4-purifier 5-constant flow pump 6-mixer 7-flow meter 8-MFB 9-hot water pipe 10-water heater 11-liquid temporarily storage 12 - product oil tank 13 - recycler 14 - hot water tank

**Suppl. Fig. 2** Magnetic fluidized bed (MFB) model

**Suppl. Fig. 3** Magnetic interaction between nanomagnetic enzyme particles.
